# Supplementary material for: Factors related to environmental barriers experienced by persons with and without disabilities in diverse African settings
Source: PubMed Central journal article supplement (PMC5638520; doi:10.1371/journal.pone.0186342), 2017-10-12
Supplement: pone.0186342.s001.pdf [file pone.0186342.s001.pdf]

| IDENTIFICATION OF HOUSEHOLD                                                                | CODE                                                                                                                                                                                                                                                                                                                                                                                                                                                                                                                                                                                                                                                                    |
|--------------------------------------------------------------------------------------------|-------------------------------------------------------------------------------------------------------------------------------------------------------------------------------------------------------------------------------------------------------------------------------------------------------------------------------------------------------------------------------------------------------------------------------------------------------------------------------------------------------------------------------------------------------------------------------------------------------------------------------------------------------------------------|
| NAME AND CODE OF REGION* _____                                                             | <input style="width: 20px; height: 20px; border: 1px solid black;" type="text"/> <input style="width: 20px; height: 20px; border: 1px solid black;" type="text"/>                                                                                                                                                                                                                                                                                                                                                                                                                                                                                                       |
| NAME AND CODE OF DISTRICT _____                                                            |                                                                                                                                                                                                                                                                                                                                                                                                                                                                                                                                                                                                                                                                         |
| NAME AND CODE OF TA* _____                                                                 | <input style="width: 20px; height: 20px; border: 1px solid black;" type="text"/> <input style="width: 20px; height: 20px; border: 1px solid black;" type="text"/>                                                                                                                                                                                                                                                                                                                                                                                                                                                                                                       |
| NAME AND CODE OF HF CATCHMENT AREA * _____                                                 | <input style="width: 20px; height: 20px; border: 1px solid black;" type="text"/> <input style="width: 20px; height: 20px; border: 1px solid black;" type="text"/>                                                                                                                                                                                                                                                                                                                                                                                                                                                                                                       |
| ENUMERATION AREA NUMBER .....                                                              | <input style="width: 20px; height: 20px; border: 1px solid black;" type="text"/> <input style="width: 20px; height: 20px; border: 1px solid black;" type="text"/> <input style="width: 20px; height: 20px; border: 1px solid black;" type="text"/> <input style="width: 20px; height: 20px; border: 1px solid black;" type="text"/> <input style="width: 20px; height: 20px; border: 1px solid black;" type="text"/> <input style="width: 20px; height: 20px; border: 1px solid black;" type="text"/> <input style="width: 20px; height: 20px; border: 1px solid black;" type="text"/> <input style="width: 20px; height: 20px; border: 1px solid black;" type="text"/> |
| LOCATION 1 = urban 2 = rural .....                                                         | <input style="width: 20px; height: 20px; border: 1px solid black;" type="text"/>                                                                                                                                                                                                                                                                                                                                                                                                                                                                                                                                                                                        |
| HOUSEHOLD NUMBER/ID .....                                                                  | <input style="width: 20px; height: 20px; border: 1px solid black;" type="text"/> <input style="width: 20px; height: 20px; border: 1px solid black;" type="text"/>                                                                                                                                                                                                                                                                                                                                                                                                                                                                                                       |
| NAME OF HOUSEHOLD HEAD _____                                                               |                                                                                                                                                                                                                                                                                                                                                                                                                                                                                                                                                                                                                                                                         |
| TOTAL NUMBER OF PERSONS IN HOUSEHOLD<br>(the same as last Line Number filled in Section A) | <input style="width: 20px; height: 20px; border: 1px solid black;" type="text"/> <input style="width: 20px; height: 20px; border: 1px solid black;" type="text"/>                                                                                                                                                                                                                                                                                                                                                                                                                                                                                                       |
| TOTAL NUMBER OF ELIGIBLE PERSONS FOR INDIVIDUAL INTERVIEW                                  | <input style="width: 20px; height: 20px; border: 1px solid black;" type="text"/> <input style="width: 20px; height: 20px; border: 1px solid black;" type="text"/>                                                                                                                                                                                                                                                                                                                                                                                                                                                                                                       |
| LINE NO. OF PRIMARY RESPONDENT                                                             | <input style="width: 20px; height: 20px; border: 1px solid black;" type="text"/> <input style="width: 20px; height: 20px; border: 1px solid black;" type="text"/>                                                                                                                                                                                                                                                                                                                                                                                                                                                                                                       |

| TO BE COMPLETED BY THE INTERVIEWER                                                                                                                                                                                                                                                                                                                                       | DATE OF INTERVIEW                                                                                                                                                                                                                                                                                                                                |
|--------------------------------------------------------------------------------------------------------------------------------------------------------------------------------------------------------------------------------------------------------------------------------------------------------------------------------------------------------------------------|--------------------------------------------------------------------------------------------------------------------------------------------------------------------------------------------------------------------------------------------------------------------------------------------------------------------------------------------------|
| Time interview starts <input style="width: 20px; height: 20px; border: 1px solid black;" type="text"/> <input style="width: 20px; height: 20px; border: 1px solid black;" type="text"/> Time completed <input style="width: 20px; height: 20px; border: 1px solid black;" type="text"/> <input style="width: 20px; height: 20px; border: 1px solid black;" type="text"/> | Day <input style="width: 20px; height: 20px; border: 1px solid black;" type="text"/> <input style="width: 20px; height: 20px; border: 1px solid black;" type="text"/>                                                                                                                                                                            |
| Name of interviewer: _____ <input style="width: 20px; height: 20px; border: 1px solid black;" type="text"/>                                                                                                                                                                                                                                                              | Month <input style="width: 20px; height: 20px; border: 1px solid black;" type="text"/> <input style="width: 20px; height: 20px; border: 1px solid black;" type="text"/>                                                                                                                                                                          |
| Comments:                                                                                                                                                                                                                                                                                                                                                                | Year <input style="width: 20px; height: 20px; border: 1px solid black;" type="text"/> 2 <input style="width: 20px; height: 20px; border: 1px solid black;" type="text"/> 0 <input style="width: 20px; height: 20px; border: 1px solid black;" type="text"/> 1 <input style="width: 20px; height: 20px; border: 1px solid black;" type="text"/> 1 |
| Signature _____                                                                                                                                                                                                                                                                                                                                                          |                                                                                                                                                                                                                                                                                                                                                  |

| SUPERVISOR                                                                                    | INTERVIEW STATUS                                                      | Enumerator has to return to the household                | CHECKED by the Supervisor |
|-----------------------------------------------------------------------------------------------|-----------------------------------------------------------------------|----------------------------------------------------------|---------------------------|
| Name : _____ <input style="width: 20px; height: 20px; border: 1px solid black;" type="text"/> | Complete <input type="checkbox"/> Incomplete <input type="checkbox"/> | Yes <input type="checkbox"/> No <input type="checkbox"/> | <input type="checkbox"/>  |
| Signature _____                                                                               |                                                                       |                                                          |                           |

| GPS INFORMATION                                                                                                                                                            |      |                                                                                                                                                                           |                                                                                                                                                                                                                                                                                                                                             |
|----------------------------------------------------------------------------------------------------------------------------------------------------------------------------|------|---------------------------------------------------------------------------------------------------------------------------------------------------------------------------|---------------------------------------------------------------------------------------------------------------------------------------------------------------------------------------------------------------------------------------------------------------------------------------------------------------------------------------------|
| Accuracy <input style="width: 20px; height: 20px; border: 1px solid black;" type="text"/> <input style="width: 20px; height: 20px; border: 1px solid black;" type="text"/> | Feet |                                                                                                                                                                           |                                                                                                                                                                                                                                                                                                                                             |
| Latitude <input style="width: 20px; height: 20px; border: 1px solid black;" type="text"/>                                                                                  | N/S  | Degrees <input style="width: 20px; height: 20px; border: 1px solid black;" type="text"/> <input style="width: 20px; height: 20px; border: 1px solid black;" type="text"/> | Minutes <input style="width: 20px; height: 20px; border: 1px solid black;" type="text"/> <input style="width: 20px; height: 20px; border: 1px solid black;" type="text"/> <input style="width: 20px; height: 20px; border: 1px solid black;" type="text"/> <input style="width: 20px; height: 20px; border: 1px solid black;" type="text"/> |
| Longitude <input style="width: 20px; height: 20px; border: 1px solid black;" type="text"/>                                                                                 | E/W  | Degrees <input style="width: 20px; height: 20px; border: 1px solid black;" type="text"/> <input style="width: 20px; height: 20px; border: 1px solid black;" type="text"/> | Minutes <input style="width: 20px; height: 20px; border: 1px solid black;" type="text"/> <input style="width: 20px; height: 20px; border: 1px solid black;" type="text"/> <input style="width: 20px; height: 20px; border: 1px solid black;" type="text"/> <input style="width: 20px; height: 20px; border: 1px solid black;" type="text"/> |

**\*Codes for REGION, CONSTITUENCY AND LOCALITY see separate sheet**

**SECTION A: HOUSEHOLD COMPOSITION: FOR ALL PERSONS**

| LINE NO. | WHO ARE PERMANENT MEMBERS OF THIS HOUSEHOLD?                                                                                   | RELATIONSHIP TO HEAD OF HOUSEHOLD                                                                                                                   | SEX                                                 | AGE                                                                                                                                                | MARITAL STATUS                                                                                            | ILLNESS/INJURY                                                                                                                                                                                                                                                                                 |
|----------|--------------------------------------------------------------------------------------------------------------------------------|-----------------------------------------------------------------------------------------------------------------------------------------------------|-----------------------------------------------------|----------------------------------------------------------------------------------------------------------------------------------------------------|-----------------------------------------------------------------------------------------------------------|------------------------------------------------------------------------------------------------------------------------------------------------------------------------------------------------------------------------------------------------------------------------------------------------|
|          | List the first names and first letter of the surname of all persons in this household, starting with the head of the household | What is the relationship of (NAME) to the head of the household? *<br><i>Kodi pali ubale wanji pakati pa (Dzina) ndi inuyo/ mutu wa banja lino?</i> | Is (NAME) male or female?<br><br>1=Male<br>2=Female | How old was (NAME) at his/her last birthday?<br><br><i>Kodi (Dzina) ali ndi zaka zingati?</i><br><br>Enter age in completed years<br>98=Don't know | What is (NAME'S) marital status? **<br><br><i>Kodi (Dzina) ali pa banja?</i><br><br>Only 12 yrs and above | Has (NAME) been seriously ill or injured during the past 6 months? If YES, what was the main illness or injury? ***<br><br><i>Kodi (Dzina) akhala akudwala kwambiri kapena kuvulala pa myezi isanu ndi umodzi yapitayi? Ngati amadwala vuto lenileni linali chani?</i><br><br>Enter "00" if NO |
| (1)      | (2)                                                                                                                            | (3)                                                                                                                                                 | (4)                                                 | (5)                                                                                                                                                | (6)                                                                                                       | (7)                                                                                                                                                                                                                                                                                            |
|          |                                                                                                                                |                                                                                                                                                     | M F                                                 | IN YEARS                                                                                                                                           |                                                                                                           |                                                                                                                                                                                                                                                                                                |
| 01       |                                                                                                                                | 0 1                                                                                                                                                 | 1 2                                                 |                                                                                                                                                    |                                                                                                           |                                                                                                                                                                                                                                                                                                |
| 02       |                                                                                                                                |                                                                                                                                                     | 1 2                                                 |                                                                                                                                                    |                                                                                                           |                                                                                                                                                                                                                                                                                                |
| 03       |                                                                                                                                |                                                                                                                                                     | 1 2                                                 |                                                                                                                                                    |                                                                                                           |                                                                                                                                                                                                                                                                                                |
| 04       |                                                                                                                                |                                                                                                                                                     | 1 2                                                 |                                                                                                                                                    |                                                                                                           |                                                                                                                                                                                                                                                                                                |
| 05       |                                                                                                                                |                                                                                                                                                     | 1 2                                                 |                                                                                                                                                    |                                                                                                           |                                                                                                                                                                                                                                                                                                |
| 06       |                                                                                                                                |                                                                                                                                                     | 1 2                                                 |                                                                                                                                                    |                                                                                                           |                                                                                                                                                                                                                                                                                                |
| 07       |                                                                                                                                |                                                                                                                                                     | 1 2                                                 |                                                                                                                                                    |                                                                                                           |                                                                                                                                                                                                                                                                                                |
| 08       |                                                                                                                                |                                                                                                                                                     | 1 2                                                 |                                                                                                                                                    |                                                                                                           |                                                                                                                                                                                                                                                                                                |
| 09       |                                                                                                                                |                                                                                                                                                     | 1 2                                                 |                                                                                                                                                    |                                                                                                           |                                                                                                                                                                                                                                                                                                |
| 10       |                                                                                                                                |                                                                                                                                                     | 1 2                                                 |                                                                                                                                                    |                                                                                                           |                                                                                                                                                                                                                                                                                                |

| *CODES FOR Q.3<br>RELATIONSHIP TO HOUSEHOLD HEAD                                                                                                                                                                                                                                                                              | **CODES FOR Q.6<br>MARITAL STATUS                                                                                                                                    | ***CODES FOR Q.7<br>MAIN ILLNESS or injury                                                                                                                                                                                                                                                                                                                                                                                        |
|-------------------------------------------------------------------------------------------------------------------------------------------------------------------------------------------------------------------------------------------------------------------------------------------------------------------------------|----------------------------------------------------------------------------------------------------------------------------------------------------------------------|-----------------------------------------------------------------------------------------------------------------------------------------------------------------------------------------------------------------------------------------------------------------------------------------------------------------------------------------------------------------------------------------------------------------------------------|
| 01 = Head<br>02 = Spouse/living in partner<br>03 = Son/Daughter (also step-)<br>04 = Son/Daughter-in-law<br>05 = Grandchild of head/spouse<br>06 = Parent/Parent-in-law<br>07 = Brother/Sister of head/spouse<br>08 = Co-wife<br>09 = Other relatives<br>10 = Domestic worker/<br>11 = Other non-relatives<br>98 = Don't know | 1 = Never married (and not cohabiting)<br>2 = Currently married<br>3 = Consensual union/Cohabiting<br>4 = Divorced/separated<br>5 = Widowed<br>8 = Don't know/refuse | 01 = Cancer<br>02 = Malaria<br>03 = TB<br>04 = Bronchitis<br>05 = Cholera<br>06 = Severe diarrhoea<br>07 = Measles<br>08 = Pneumonia<br>09 = Heart disease<br>10 = High blood pressure<br>11 = Diabetes<br>12 = HIV/AIDS<br><br>13 = Malnutrition<br>14 = Mental illness<br>15 = High fever/meningitis<br>16 = Epilepsy<br>17 = Physical injury<br>18 = Asthma<br>19 = Other disease or injury (specify :)<br><br>98 = Don't know |

**SECTION A: HOUSEHOLD COMPOSITION: FOR ALL PERSONS – cont. for household member 11 -20**

| LINE NO. | WHO ARE PERMANENT MEMBERS OF THIS HOUSEHOLD?                                                                                    | RELATIONSHIP TO HEAD OF HOUSEHOLD                                                                                                                   | SEX                                             | AGE                                                                                                                                                | MARITAL STATUS                                                                                            | ILLNESS/ INJURY                                                                                                                                                                                                                                                                                |
|----------|---------------------------------------------------------------------------------------------------------------------------------|-----------------------------------------------------------------------------------------------------------------------------------------------------|-------------------------------------------------|----------------------------------------------------------------------------------------------------------------------------------------------------|-----------------------------------------------------------------------------------------------------------|------------------------------------------------------------------------------------------------------------------------------------------------------------------------------------------------------------------------------------------------------------------------------------------------|
|          | List the first names and first letter of the surname of all persons in this household, starting with the head of the household. | What is the relationship of (NAME) to the head of the household? *<br><i>Kodi pali ubale wanji pakati pa (Dzina) ndi inuyo/ mutu wa banja lino?</i> | Is (NAME) male or female?<br>1=Male<br>2=Female | How old was (NAME) at his/her last birthday?<br><br><i>Kodi (Dzina) ali ndi zaka zingati?</i><br><br>Enter age in completed years<br>98=Don't know | What is (NAME'S) marital status? **<br><br><i>Kodi (Dzina) ali pa banja?</i><br><br>Only 12 yrs and above | Has (NAME) been seriously ill or injured during the past 6 months? If YES, what was the main illness or injury? ***<br><br><i>Kodi (Dzina) akhala akudwala kwambiri kapena kuvulala pa myezi isanu ndi umodzi yapitayi? Ngati amadwala vuto lenileni linali chani?</i><br><br>Enter "00" if NO |
| (1)      | (2)                                                                                                                             | (3)                                                                                                                                                 | (4)                                             | (5)                                                                                                                                                | (6)                                                                                                       | (7)                                                                                                                                                                                                                                                                                            |
|          |                                                                                                                                 |                                                                                                                                                     | M   F                                           | IN YEARS                                                                                                                                           |                                                                                                           |                                                                                                                                                                                                                                                                                                |
| 11       |                                                                                                                                 | <input type="text"/>                                                                                                                                | 1   2                                           | <input type="text"/>                                                                                                                               | <input type="text"/>                                                                                      | <input type="text"/>                                                                                                                                                                                                                                                                           |
| 12       |                                                                                                                                 | <input type="text"/>                                                                                                                                | 1   2                                           | <input type="text"/>                                                                                                                               | <input type="text"/>                                                                                      | <input type="text"/>                                                                                                                                                                                                                                                                           |
| 13       |                                                                                                                                 | <input type="text"/>                                                                                                                                | 1   2                                           | <input type="text"/>                                                                                                                               | <input type="text"/>                                                                                      | <input type="text"/>                                                                                                                                                                                                                                                                           |
| 14       |                                                                                                                                 | <input type="text"/>                                                                                                                                | 1   2                                           | <input type="text"/>                                                                                                                               | <input type="text"/>                                                                                      | <input type="text"/>                                                                                                                                                                                                                                                                           |
| 15       |                                                                                                                                 | <input type="text"/>                                                                                                                                | 1   2                                           | <input type="text"/>                                                                                                                               | <input type="text"/>                                                                                      | <input type="text"/>                                                                                                                                                                                                                                                                           |
| 16       |                                                                                                                                 | <input type="text"/>                                                                                                                                | 1   2                                           | <input type="text"/>                                                                                                                               | <input type="text"/>                                                                                      | <input type="text"/>                                                                                                                                                                                                                                                                           |
| 17       |                                                                                                                                 | <input type="text"/>                                                                                                                                | 1   2                                           | <input type="text"/>                                                                                                                               | <input type="text"/>                                                                                      | <input type="text"/>                                                                                                                                                                                                                                                                           |
| 18       |                                                                                                                                 | <input type="text"/>                                                                                                                                | 1   2                                           | <input type="text"/>                                                                                                                               | <input type="text"/>                                                                                      | <input type="text"/>                                                                                                                                                                                                                                                                           |
| 19       |                                                                                                                                 | <input type="text"/>                                                                                                                                | 1   2                                           | <input type="text"/>                                                                                                                               | <input type="text"/>                                                                                      | <input type="text"/>                                                                                                                                                                                                                                                                           |
| 20       |                                                                                                                                 | <input type="text"/>                                                                                                                                | 1   2                                           | <input type="text"/>                                                                                                                               | <input type="text"/>                                                                                      | <input type="text"/>                                                                                                                                                                                                                                                                           |

IF THERE ARE MORE THAN 20 PERSONS IN THE HOUSEHOLD, PLEASE USE A CONTINUATION SHEET AND TICK THE FOLLOWING BOX

**SECTION B: DISABILITY SCREENING: FOR ALL PERSONS**

| LINE NO. | Because of a HEALTH PROBLEM... <i>Chifukwa cha matenda ....</i>                                                                               |                                                                                                                                                                            |                                                                                                                              |                                                                                                                                                            |                                                                                                                                                                        |                                                                                                                                                                                                                                  |                                                                                                                            |                                                                                                                                                                                        |                          | Mark <b>X</b> person w. an activity limitation<br><br>Is (NAME) <b>5 yrs old</b> or above?<br><br>YES → Q.15<br>NO → STOP<br><br><b>CHECK Q,5</b> |    |
|----------|-----------------------------------------------------------------------------------------------------------------------------------------------|----------------------------------------------------------------------------------------------------------------------------------------------------------------------------|------------------------------------------------------------------------------------------------------------------------------|------------------------------------------------------------------------------------------------------------------------------------------------------------|------------------------------------------------------------------------------------------------------------------------------------------------------------------------|----------------------------------------------------------------------------------------------------------------------------------------------------------------------------------------------------------------------------------|----------------------------------------------------------------------------------------------------------------------------|----------------------------------------------------------------------------------------------------------------------------------------------------------------------------------------|--------------------------|---------------------------------------------------------------------------------------------------------------------------------------------------|----|
|          | Does (NAME) have difficulty seeing, even if wearing glasses?<br><i>Kodi (Dzina) ali ndi vuto lili lonse lowona ngakhale atavala magalasi?</i> | Does (NAME) have difficulty hearing, even if using a hearing aid?<br><i>Kodi (Dzina) ali ndi vuto la kumva ngakhale akugwiritsa ntchito zipangizo zomthandazira kumva?</i> | Does (NAME) have difficulty walking or climbing steps?<br><i>Kodi (Dzina) ali ndi vuto loyenda kapena kukwera masitepe ?</i> | Does (NAME) have any difficulty remembering or concentrating?<br><i>Kodi (Dzina) ali ndi vuto lilonse lokhuza kloyiwala kapena kukhazikika m'maganizo?</i> | Does (NAME) have difficulty with self-care such as washing all over or dressing?<br><i>Kodi (dzina) ali ndi vuto lili lonse lozisamalira yekha posamba ndi kuvala?</i> | Using the usual language, does (NAME) have difficulty communicating for example understanding or being understood?<br><i>Pogwiritsa ntchito chinenero chake, Kodi (Dzina) ali ndi vuto lilonse akafuna kulumikizana payekha?</i> | Does (NAME) have a problem with nerves, sadness or depression?<br><i>Kodi (Dzina) ali ndi vuto la kukhumudwa khumudwa.</i> | Does (NAME) have problem performing tasks that are expected of people of their age?<br><i>Kodi (Dzina) ali ndi vuto kugwira ntchito zimene anthu amusinthu wake amayenera kugwira?</i> |                          |                                                                                                                                                   |    |
| (1)      | (8)                                                                                                                                           | (9)                                                                                                                                                                        | (10)                                                                                                                         | (11)                                                                                                                                                       | (12)                                                                                                                                                                   | (13)                                                                                                                                                                                                                             | (14)                                                                                                                       | (15)                                                                                                                                                                                   | (16A)                    | (16B)                                                                                                                                             |    |
|          | 1: NO<br>2: SOME<br>3: A LOT<br>4: UNABLE                                                                                                     | 1: NO<br>2: SOME<br>3: A LOT<br>4: UNABLE                                                                                                                                  | 1: NO<br>2: SOME<br>3: A LOT<br>4: UNABLE                                                                                    | 1: NO<br>2: SOME<br>3: A LOT<br>4: UNABLE                                                                                                                  | 1: NO<br>2: SOME<br>3: A LOT<br>4: UNABLE                                                                                                                              | 1: NO<br>2: SOME<br>3: A LOT<br>4: UNABLE                                                                                                                                                                                        | 1: NO<br>2: SOME<br>3: A LOT<br>4: UNABLE                                                                                  | 1: NO<br>2: SOME<br>3: A LOT<br>4: UNABLE                                                                                                                                              |                          | YES                                                                                                                                               | NO |
| 01       | <input type="checkbox"/>                                                                                                                      | <input type="checkbox"/>                                                                                                                                                   | <input type="checkbox"/>                                                                                                     | <input type="checkbox"/>                                                                                                                                   | <input type="checkbox"/>                                                                                                                                               | <input type="checkbox"/>                                                                                                                                                                                                         | <input type="checkbox"/>                                                                                                   | <input type="checkbox"/>                                                                                                                                                               | <input type="checkbox"/> | 1                                                                                                                                                 | 2  |
| 02       | <input type="checkbox"/>                                                                                                                      | <input type="checkbox"/>                                                                                                                                                   | <input type="checkbox"/>                                                                                                     | <input type="checkbox"/>                                                                                                                                   | <input type="checkbox"/>                                                                                                                                               | <input type="checkbox"/>                                                                                                                                                                                                         | <input type="checkbox"/>                                                                                                   | <input type="checkbox"/>                                                                                                                                                               | <input type="checkbox"/> | 1                                                                                                                                                 | 2  |
| 03       | <input type="checkbox"/>                                                                                                                      | <input type="checkbox"/>                                                                                                                                                   | <input type="checkbox"/>                                                                                                     | <input type="checkbox"/>                                                                                                                                   | <input type="checkbox"/>                                                                                                                                               | <input type="checkbox"/>                                                                                                                                                                                                         | <input type="checkbox"/>                                                                                                   | <input type="checkbox"/>                                                                                                                                                               | <input type="checkbox"/> | 1                                                                                                                                                 | 2  |
| 04       | <input type="checkbox"/>                                                                                                                      | <input type="checkbox"/>                                                                                                                                                   | <input type="checkbox"/>                                                                                                     | <input type="checkbox"/>                                                                                                                                   | <input type="checkbox"/>                                                                                                                                               | <input type="checkbox"/>                                                                                                                                                                                                         | <input type="checkbox"/>                                                                                                   | <input type="checkbox"/>                                                                                                                                                               | <input type="checkbox"/> | 1                                                                                                                                                 | 2  |
| 05       | <input type="checkbox"/>                                                                                                                      | <input type="checkbox"/>                                                                                                                                                   | <input type="checkbox"/>                                                                                                     | <input type="checkbox"/>                                                                                                                                   | <input type="checkbox"/>                                                                                                                                               | <input type="checkbox"/>                                                                                                                                                                                                         | <input type="checkbox"/>                                                                                                   | <input type="checkbox"/>                                                                                                                                                               | <input type="checkbox"/> | 1                                                                                                                                                 | 2  |
| 06       | <input type="checkbox"/>                                                                                                                      | <input type="checkbox"/>                                                                                                                                                   | <input type="checkbox"/>                                                                                                     | <input type="checkbox"/>                                                                                                                                   | <input type="checkbox"/>                                                                                                                                               | <input type="checkbox"/>                                                                                                                                                                                                         | <input type="checkbox"/>                                                                                                   | <input type="checkbox"/>                                                                                                                                                               | <input type="checkbox"/> | 1                                                                                                                                                 | 2  |
| 07       | <input type="checkbox"/>                                                                                                                      | <input type="checkbox"/>                                                                                                                                                   | <input type="checkbox"/>                                                                                                     | <input type="checkbox"/>                                                                                                                                   | <input type="checkbox"/>                                                                                                                                               | <input type="checkbox"/>                                                                                                                                                                                                         | <input type="checkbox"/>                                                                                                   | <input type="checkbox"/>                                                                                                                                                               | <input type="checkbox"/> | 1                                                                                                                                                 | 2  |
| 08       | <input type="checkbox"/>                                                                                                                      | <input type="checkbox"/>                                                                                                                                                   | <input type="checkbox"/>                                                                                                     | <input type="checkbox"/>                                                                                                                                   | <input type="checkbox"/>                                                                                                                                               | <input type="checkbox"/>                                                                                                                                                                                                         | <input type="checkbox"/>                                                                                                   | <input type="checkbox"/>                                                                                                                                                               | <input type="checkbox"/> | 1                                                                                                                                                 | 2  |
| 09       | <input type="checkbox"/>                                                                                                                      | <input type="checkbox"/>                                                                                                                                                   | <input type="checkbox"/>                                                                                                     | <input type="checkbox"/>                                                                                                                                   | <input type="checkbox"/>                                                                                                                                               | <input type="checkbox"/>                                                                                                                                                                                                         | <input type="checkbox"/>                                                                                                   | <input type="checkbox"/>                                                                                                                                                               | <input type="checkbox"/> | 1                                                                                                                                                 | 2  |

**SECTION B: DISABILITY SCREENING: FOR ALL PERSONS**

| LINE NO. | Because of a HEALTH PROBLEM... <i>Chifukwa cha matenda ....</i>                                                                               |                                                                                                                                                                            |                                                                                                                              |                                                                                                                                                            |                                                                                                                                                                        |                                                                                                                                                                                                                                  |                                                                                                                            |                                                                                                                                                                                        |                                           | Mark <b>X</b> person w. an activity limitation<br>Is (NAME) <b>5 yrs old</b> or above?<br>YES → Q.15<br>NO → STOP<br><b>CHECK Q,5</b> |    |                                           |                                           |                                           |
|----------|-----------------------------------------------------------------------------------------------------------------------------------------------|----------------------------------------------------------------------------------------------------------------------------------------------------------------------------|------------------------------------------------------------------------------------------------------------------------------|------------------------------------------------------------------------------------------------------------------------------------------------------------|------------------------------------------------------------------------------------------------------------------------------------------------------------------------|----------------------------------------------------------------------------------------------------------------------------------------------------------------------------------------------------------------------------------|----------------------------------------------------------------------------------------------------------------------------|----------------------------------------------------------------------------------------------------------------------------------------------------------------------------------------|-------------------------------------------|---------------------------------------------------------------------------------------------------------------------------------------|----|-------------------------------------------|-------------------------------------------|-------------------------------------------|
|          | Does (NAME) have difficulty seeing, even if wearing glasses?<br><i>Kodi (Dzina) ali ndi vuto lili lonse lowona ngakhale atavala magalasi?</i> | Does (NAME) have difficulty hearing, even if using a hearing aid?<br><i>Kodi (Dzina) ali ndi vuto la kumva ngakhale akugwiritsa ntchito zipangizo zomthandazira kumva?</i> | Does (NAME) have difficulty walking or climbing steps?<br><i>Kodi (Dzina) ali ndi vuto loyenda kapena kukwera masitepe ?</i> | Does (NAME) have any difficulty remembering or concentrating?<br><i>Kodi (Dzina) ali ndi vuto lilonse lokhuza kloyiwala kapena kukhazikika m'maganizo?</i> | Does (NAME) have difficulty with self-care such as washing all over or dressing?<br><i>Kodi (dzina) ali ndi vuto lili lonse lozisamalira yekha posamba ndi kuvala?</i> | Using the usual language, does (NAME) have difficulty communicating for example understanding or being understood?<br><i>Pogwiritsa ntchito chinenero chake, Kodi (Dzina) ali ndi vuto lilonse akafuna kulumikizana payekha?</i> | Does (NAME) have a problem with nerves, sadness of depression?<br><i>Kodi (Dzina) ali ndi vuto la kukhumudwa khumudwa.</i> | Does (NAME) have problem performing tasks that are expected of people of their age?<br><i>Kodi (Dzina) ali ndi vuto kugwira ntchito zimene anthu amusinthu wake amayenera kugwira?</i> | 1: NO<br>2: SOME<br>3: A LOT<br>4: UNABLE |                                                                                                                                       |    | 1: NO<br>2: SOME<br>3: A LOT<br>4: UNABLE | 1: NO<br>2: SOME<br>3: A LOT<br>4: UNABLE | 1: NO<br>2: SOME<br>3: A LOT<br>4: UNABLE |
| (1)      | (8)                                                                                                                                           | (9)                                                                                                                                                                        | (10)                                                                                                                         | (11)                                                                                                                                                       | (12)                                                                                                                                                                   | (13)                                                                                                                                                                                                                             | (14)                                                                                                                       | (15)                                                                                                                                                                                   | (16A)                                     | (16B)                                                                                                                                 |    |                                           |                                           |                                           |
|          |                                                                                                                                               |                                                                                                                                                                            |                                                                                                                              |                                                                                                                                                            |                                                                                                                                                                        |                                                                                                                                                                                                                                  |                                                                                                                            |                                                                                                                                                                                        |                                           | YES                                                                                                                                   | NO |                                           |                                           |                                           |
| 11       | <input type="checkbox"/>                                                                                                                      | <input type="checkbox"/>                                                                                                                                                   | <input type="checkbox"/>                                                                                                     | <input type="checkbox"/>                                                                                                                                   | <input type="checkbox"/>                                                                                                                                               | <input type="checkbox"/>                                                                                                                                                                                                         | <input type="checkbox"/>                                                                                                   | <input type="checkbox"/>                                                                                                                                                               | <input type="checkbox"/>                  | 1                                                                                                                                     | 2  |                                           |                                           |                                           |
| 12       | <input type="checkbox"/>                                                                                                                      | <input type="checkbox"/>                                                                                                                                                   | <input type="checkbox"/>                                                                                                     | <input type="checkbox"/>                                                                                                                                   | <input type="checkbox"/>                                                                                                                                               | <input type="checkbox"/>                                                                                                                                                                                                         | <input type="checkbox"/>                                                                                                   | <input type="checkbox"/>                                                                                                                                                               | <input type="checkbox"/>                  | 1                                                                                                                                     | 2  |                                           |                                           |                                           |
| 13       | <input type="checkbox"/>                                                                                                                      | <input type="checkbox"/>                                                                                                                                                   | <input type="checkbox"/>                                                                                                     | <input type="checkbox"/>                                                                                                                                   | <input type="checkbox"/>                                                                                                                                               | <input type="checkbox"/>                                                                                                                                                                                                         | <input type="checkbox"/>                                                                                                   | <input type="checkbox"/>                                                                                                                                                               | <input type="checkbox"/>                  | 1                                                                                                                                     | 2  |                                           |                                           |                                           |
| 14       | <input type="checkbox"/>                                                                                                                      | <input type="checkbox"/>                                                                                                                                                   | <input type="checkbox"/>                                                                                                     | <input type="checkbox"/>                                                                                                                                   | <input type="checkbox"/>                                                                                                                                               | <input type="checkbox"/>                                                                                                                                                                                                         | <input type="checkbox"/>                                                                                                   | <input type="checkbox"/>                                                                                                                                                               | <input type="checkbox"/>                  | 1                                                                                                                                     | 2  |                                           |                                           |                                           |
| 15       | <input type="checkbox"/>                                                                                                                      | <input type="checkbox"/>                                                                                                                                                   | <input type="checkbox"/>                                                                                                     | <input type="checkbox"/>                                                                                                                                   | <input type="checkbox"/>                                                                                                                                               | <input type="checkbox"/>                                                                                                                                                                                                         | <input type="checkbox"/>                                                                                                   | <input type="checkbox"/>                                                                                                                                                               | <input type="checkbox"/>                  | 1                                                                                                                                     | 2  |                                           |                                           |                                           |
| 16       | <input type="checkbox"/>                                                                                                                      | <input type="checkbox"/>                                                                                                                                                   | <input type="checkbox"/>                                                                                                     | <input type="checkbox"/>                                                                                                                                   | <input type="checkbox"/>                                                                                                                                               | <input type="checkbox"/>                                                                                                                                                                                                         | <input type="checkbox"/>                                                                                                   | <input type="checkbox"/>                                                                                                                                                               | <input type="checkbox"/>                  | 1                                                                                                                                     | 2  |                                           |                                           |                                           |
| 17       | <input type="checkbox"/>                                                                                                                      | <input type="checkbox"/>                                                                                                                                                   | <input type="checkbox"/>                                                                                                     | <input type="checkbox"/>                                                                                                                                   | <input type="checkbox"/>                                                                                                                                               | <input type="checkbox"/>                                                                                                                                                                                                         | <input type="checkbox"/>                                                                                                   | <input type="checkbox"/>                                                                                                                                                               | <input type="checkbox"/>                  | 1                                                                                                                                     | 2  |                                           |                                           |                                           |
| 18       | <input type="checkbox"/>                                                                                                                      | <input type="checkbox"/>                                                                                                                                                   | <input type="checkbox"/>                                                                                                     | <input type="checkbox"/>                                                                                                                                   | <input type="checkbox"/>                                                                                                                                               | <input type="checkbox"/>                                                                                                                                                                                                         | <input type="checkbox"/>                                                                                                   | <input type="checkbox"/>                                                                                                                                                               | <input type="checkbox"/>                  | 1                                                                                                                                     | 2  |                                           |                                           |                                           |
| 19       | <input type="checkbox"/>                                                                                                                      | <input type="checkbox"/>                                                                                                                                                   | <input type="checkbox"/>                                                                                                     | <input type="checkbox"/>                                                                                                                                   | <input type="checkbox"/>                                                                                                                                               | <input type="checkbox"/>                                                                                                                                                                                                         | <input type="checkbox"/>                                                                                                   | <input type="checkbox"/>                                                                                                                                                               | <input type="checkbox"/>                  | 1                                                                                                                                     | 2  |                                           |                                           |                                           |
| 20       | <input type="checkbox"/>                                                                                                                      | <input type="checkbox"/>                                                                                                                                                   | <input type="checkbox"/>                                                                                                     | <input type="checkbox"/>                                                                                                                                   | <input type="checkbox"/>                                                                                                                                               | <input type="checkbox"/>                                                                                                                                                                                                         | <input type="checkbox"/>                                                                                                   | <input type="checkbox"/>                                                                                                                                                               | <input type="checkbox"/>                  |                                                                                                                                       |    |                                           |                                           |                                           |

**SECTION C: LEVEL OF EDUCATION AND EMPLOYMENT – AGED 5 YEARS OR ABOVE**

| LINE NO.                                                                                                                                        | HIGHEST LEVEL COMPLETED*                                                                                  | LITERACY                                                                                                                                                                                                                                  | WORK STATUS**                                                                           |                          |                                                                                                                                                 |  |  |
|-------------------------------------------------------------------------------------------------------------------------------------------------|-----------------------------------------------------------------------------------------------------------|-------------------------------------------------------------------------------------------------------------------------------------------------------------------------------------------------------------------------------------------|-----------------------------------------------------------------------------------------|--------------------------|-------------------------------------------------------------------------------------------------------------------------------------------------|--|--|
| Transfer the LINE NO. of persons as listed in Sect. A who are 5 yrs old or above                                                                | What is the highest level of education [NAME] completed?*<br><i>Kodi (Dzina) sukulu analekezera pati?</i> | Can (NAME) read and write in any language?<br><br><i>Kodi (Dzina) angathe kuwerenga kapena kulemba mu chiyankhulo chili chonse?</i><br><br>1 = YES, I CAN READ AND WRITE<br>2 = YES, I CAN READ BUT NOT WRITE<br>3 = NO<br>8 = DON'T KNOW | What is the work status of (NAME)?**<br><br><i>Kodi (Dzina) amagwira ntchito yanji?</i> |                          |                                                                                                                                                 |  |  |
| (1)                                                                                                                                             | (15)                                                                                                      | (16)                                                                                                                                                                                                                                      | (17)                                                                                    |                          |                                                                                                                                                 |  |  |
| <table border="1" style="width: 100%; text-align: center;"> <tr> <td style="width: 20px;">0</td> <td style="width: 20px;">1</td> </tr> </table> | 0                                                                                                         | 1                                                                                                                                                                                                                                         | <input type="checkbox"/>                                                                | <input type="checkbox"/> | <table border="1" style="width: 100%; text-align: center;"> <tr> <td style="width: 20px;"> </td> <td style="width: 20px;"> </td> </tr> </table> |  |  |
| 0                                                                                                                                               | 1                                                                                                         |                                                                                                                                                                                                                                           |                                                                                         |                          |                                                                                                                                                 |  |  |
|                                                                                                                                                 |                                                                                                           |                                                                                                                                                                                                                                           |                                                                                         |                          |                                                                                                                                                 |  |  |
| <table border="1" style="width: 100%; text-align: center;"> <tr> <td style="width: 20px;"> </td> <td style="width: 20px;"> </td> </tr> </table> |                                                                                                           |                                                                                                                                                                                                                                           | <input type="checkbox"/>                                                                | <input type="checkbox"/> | <table border="1" style="width: 100%; text-align: center;"> <tr> <td style="width: 20px;"> </td> <td style="width: 20px;"> </td> </tr> </table> |  |  |
|                                                                                                                                                 |                                                                                                           |                                                                                                                                                                                                                                           |                                                                                         |                          |                                                                                                                                                 |  |  |
|                                                                                                                                                 |                                                                                                           |                                                                                                                                                                                                                                           |                                                                                         |                          |                                                                                                                                                 |  |  |
| <table border="1" style="width: 100%; text-align: center;"> <tr> <td style="width: 20px;"> </td> <td style="width: 20px;"> </td> </tr> </table> |                                                                                                           |                                                                                                                                                                                                                                           | <input type="checkbox"/>                                                                | <input type="checkbox"/> | <table border="1" style="width: 100%; text-align: center;"> <tr> <td style="width: 20px;"> </td> <td style="width: 20px;"> </td> </tr> </table> |  |  |
|                                                                                                                                                 |                                                                                                           |                                                                                                                                                                                                                                           |                                                                                         |                          |                                                                                                                                                 |  |  |
|                                                                                                                                                 |                                                                                                           |                                                                                                                                                                                                                                           |                                                                                         |                          |                                                                                                                                                 |  |  |
| <table border="1" style="width: 100%; text-align: center;"> <tr> <td style="width: 20px;"> </td> <td style="width: 20px;"> </td> </tr> </table> |                                                                                                           |                                                                                                                                                                                                                                           | <input type="checkbox"/>                                                                | <input type="checkbox"/> | <table border="1" style="width: 100%; text-align: center;"> <tr> <td style="width: 20px;"> </td> <td style="width: 20px;"> </td> </tr> </table> |  |  |
|                                                                                                                                                 |                                                                                                           |                                                                                                                                                                                                                                           |                                                                                         |                          |                                                                                                                                                 |  |  |
|                                                                                                                                                 |                                                                                                           |                                                                                                                                                                                                                                           |                                                                                         |                          |                                                                                                                                                 |  |  |
| <table border="1" style="width: 100%; text-align: center;"> <tr> <td style="width: 20px;"> </td> <td style="width: 20px;"> </td> </tr> </table> |                                                                                                           |                                                                                                                                                                                                                                           | <input type="checkbox"/>                                                                | <input type="checkbox"/> | <table border="1" style="width: 100%; text-align: center;"> <tr> <td style="width: 20px;"> </td> <td style="width: 20px;"> </td> </tr> </table> |  |  |
|                                                                                                                                                 |                                                                                                           |                                                                                                                                                                                                                                           |                                                                                         |                          |                                                                                                                                                 |  |  |
|                                                                                                                                                 |                                                                                                           |                                                                                                                                                                                                                                           |                                                                                         |                          |                                                                                                                                                 |  |  |
| <table border="1" style="width: 100%; text-align: center;"> <tr> <td style="width: 20px;"> </td> <td style="width: 20px;"> </td> </tr> </table> |                                                                                                           |                                                                                                                                                                                                                                           | <input type="checkbox"/>                                                                | <input type="checkbox"/> | <table border="1" style="width: 100%; text-align: center;"> <tr> <td style="width: 20px;"> </td> <td style="width: 20px;"> </td> </tr> </table> |  |  |
|                                                                                                                                                 |                                                                                                           |                                                                                                                                                                                                                                           |                                                                                         |                          |                                                                                                                                                 |  |  |
|                                                                                                                                                 |                                                                                                           |                                                                                                                                                                                                                                           |                                                                                         |                          |                                                                                                                                                 |  |  |
| <table border="1" style="width: 100%; text-align: center;"> <tr> <td style="width: 20px;"> </td> <td style="width: 20px;"> </td> </tr> </table> |                                                                                                           |                                                                                                                                                                                                                                           | <input type="checkbox"/>                                                                | <input type="checkbox"/> | <table border="1" style="width: 100%; text-align: center;"> <tr> <td style="width: 20px;"> </td> <td style="width: 20px;"> </td> </tr> </table> |  |  |
|                                                                                                                                                 |                                                                                                           |                                                                                                                                                                                                                                           |                                                                                         |                          |                                                                                                                                                 |  |  |
|                                                                                                                                                 |                                                                                                           |                                                                                                                                                                                                                                           |                                                                                         |                          |                                                                                                                                                 |  |  |
| <table border="1" style="width: 100%; text-align: center;"> <tr> <td style="width: 20px;"> </td> <td style="width: 20px;"> </td> </tr> </table> |                                                                                                           |                                                                                                                                                                                                                                           | <input type="checkbox"/>                                                                | <input type="checkbox"/> | <table border="1" style="width: 100%; text-align: center;"> <tr> <td style="width: 20px;"> </td> <td style="width: 20px;"> </td> </tr> </table> |  |  |
|                                                                                                                                                 |                                                                                                           |                                                                                                                                                                                                                                           |                                                                                         |                          |                                                                                                                                                 |  |  |
|                                                                                                                                                 |                                                                                                           |                                                                                                                                                                                                                                           |                                                                                         |                          |                                                                                                                                                 |  |  |
| <table border="1" style="width: 100%; text-align: center;"> <tr> <td style="width: 20px;"> </td> <td style="width: 20px;"> </td> </tr> </table> |                                                                                                           |                                                                                                                                                                                                                                           | <input type="checkbox"/>                                                                | <input type="checkbox"/> | <table border="1" style="width: 100%; text-align: center;"> <tr> <td style="width: 20px;"> </td> <td style="width: 20px;"> </td> </tr> </table> |  |  |
|                                                                                                                                                 |                                                                                                           |                                                                                                                                                                                                                                           |                                                                                         |                          |                                                                                                                                                 |  |  |
|                                                                                                                                                 |                                                                                                           |                                                                                                                                                                                                                                           |                                                                                         |                          |                                                                                                                                                 |  |  |
| <table border="1" style="width: 100%; text-align: center;"> <tr> <td style="width: 20px;"> </td> <td style="width: 20px;"> </td> </tr> </table> |                                                                                                           |                                                                                                                                                                                                                                           | <input type="checkbox"/>                                                                | <input type="checkbox"/> | <table border="1" style="width: 100%; text-align: center;"> <tr> <td style="width: 20px;"> </td> <td style="width: 20px;"> </td> </tr> </table> |  |  |
|                                                                                                                                                 |                                                                                                           |                                                                                                                                                                                                                                           |                                                                                         |                          |                                                                                                                                                 |  |  |
|                                                                                                                                                 |                                                                                                           |                                                                                                                                                                                                                                           |                                                                                         |                          |                                                                                                                                                 |  |  |

|                                                                                                                                                                                                                  |                                                                                                                                                                                                                                                                                                                                                                  |
|------------------------------------------------------------------------------------------------------------------------------------------------------------------------------------------------------------------|------------------------------------------------------------------------------------------------------------------------------------------------------------------------------------------------------------------------------------------------------------------------------------------------------------------------------------------------------------------|
| <b>*CODES FOR Q.15</b><br><b>HIGHEST LEVEL OF EDUCATION COMPLETED</b>                                                                                                                                            | <b>**CODE FOR Q.17</b><br><b>WORK STATUS</b>                                                                                                                                                                                                                                                                                                                     |
| 0 = No formal education<br>1 = Less than primary school<br>2 = Primary school<br>3 = Secondary school/ High school (or equivalent)<br>4 = Tertiary level education<br>5 = Other, specify .....<br>8 = Don't know | 01 = Paid work<br>02 = Self employed, such as own business or farming<br>03 = Non-paid work such as volunteer or charity<br>04 = Student/learner<br>05 = Keeping house/homemaker (unpaid)<br>06 = Retired<br>07 = Unemployed (health reasons)<br>08 = Unemployed (disability reason)<br>09 = Unemployed (other reasons)<br>10 = Others<br>98 = Don't know/Refuse |

**SECTION C: LEVEL OF EDUCATION AND EMPLOYMENT – AGED 5 YEARS OR ABOVE – cont. 11 to 20**

| LINE NO.                                                                         | HIGHEST GRADE COMPLETED*                                                   | LITERACY                                                                          | WORK STATUS**                               |
|----------------------------------------------------------------------------------|----------------------------------------------------------------------------|-----------------------------------------------------------------------------------|---------------------------------------------|
| Transfer the LINE NO. of persons as listed in Sect. A who are 5 yrs old or above | What is the highest standard form or level of education [NAME] completed?* | Can (NAME) read and write in any language?                                        | What is the work status of (NAME)?**        |
|                                                                                  | <i>Kodi (Dzina) sukulu analekezera pati?</i>                               | <i>Kodi (Dzina) angathe kuwerenga kapena kulemba mu chiyankhulo chili chonse?</i> | <i>Kodi (Dzina) amagwira ntchito yanji?</i> |
| 1 = YES<br>2 = NO<br>8 = DON'T KNOW                                              |                                                                            |                                                                                   |                                             |
| (1)                                                                              | (15)                                                                       | (16)                                                                              | (17)                                        |
| <input type="text"/>                                                             | <input type="text"/>                                                       | <input type="text"/>                                                              | <input type="text"/>                        |
| <input type="text"/>                                                             | <input type="text"/>                                                       | <input type="text"/>                                                              | <input type="text"/>                        |
| <input type="text"/>                                                             | <input type="text"/>                                                       | <input type="text"/>                                                              | <input type="text"/>                        |
| <input type="text"/>                                                             | <input type="text"/>                                                       | <input type="text"/>                                                              | <input type="text"/>                        |
| <input type="text"/>                                                             | <input type="text"/>                                                       | <input type="text"/>                                                              | <input type="text"/>                        |
| <input type="text"/>                                                             | <input type="text"/>                                                       | <input type="text"/>                                                              | <input type="text"/>                        |
| <input type="text"/>                                                             | <input type="text"/>                                                       | <input type="text"/>                                                              | <input type="text"/>                        |
| <input type="text"/>                                                             | <input type="text"/>                                                       | <input type="text"/>                                                              | <input type="text"/>                        |
| <input type="text"/>                                                             | <input type="text"/>                                                       | <input type="text"/>                                                              | <input type="text"/>                        |
| <input type="text"/>                                                             | <input type="text"/>                                                       | <input type="text"/>                                                              | <input type="text"/>                        |
| <input type="text"/>                                                             | <input type="text"/>                                                       | <input type="text"/>                                                              | <input type="text"/>                        |
| <input type="text"/>                                                             | <input type="text"/>                                                       | <input type="text"/>                                                              | <input type="text"/>                        |
| <input type="text"/>                                                             | <input type="text"/>                                                       | <input type="text"/>                                                              | <input type="text"/>                        |

| *CODES FOR Q.15<br>HIGHEST GRADE COMPLETED                                                                                                                                                           | *CODE FOR Q.17<br>WORK STATUS                                                                                                                                                                                                                                                                                                                                    |
|------------------------------------------------------------------------------------------------------------------------------------------------------------------------------------------------------|------------------------------------------------------------------------------------------------------------------------------------------------------------------------------------------------------------------------------------------------------------------------------------------------------------------------------------------------------------------|
| 0 = No formal education<br>1 = Less than primary school<br>2 = Primary school<br>3 = Secondary school/<br>High school (or equivalent)<br>4 = Tertiary level education<br>5 = Other<br>8 = Don't know | 01 = Paid work<br>02 = Self employed, such as own business or farming<br>03 = Non-paid work such as volunteer or charity<br>04 = Student/learner<br>05 = Keeping house/homemaker (unpaid)<br>06 = Retired<br>07 = Unemployed (health reasons)<br>08 = Unemployed (disability reason)<br>09 = Unemployed (other reasons)<br>10 = Others<br>98 = Don't know/Refuse |

**SECTION D: INCOME AND EXPENSES**

**Question (18):**

What is the PRIMARY source and SECONDARY source (if any) of income in your household?

*Kodi ndi njira yiti yodalilika komanso njira zina yopezera ndalama zothandizira pa khomo panu?*

| <b>Income Category</b>                             | <b>Primary source<br/>[Circle <i>one</i> only]</b> | <b>Secondary source<br/>[Circle <i>one</i> only]</b> |
|----------------------------------------------------|----------------------------------------------------|------------------------------------------------------|
| a. Wage/Salary work                                | 01                                                 | 01                                                   |
| b. Remittances received                            | 02                                                 | 02                                                   |
| c. Cash cropping                                   | 03                                                 | 03                                                   |
| d. Livestock sales                                 | 04                                                 | 04                                                   |
| e. Subsistence farming/fishing                     | 05                                                 | 05                                                   |
| f. <i>Ganyu</i> (Casual labour)                    | 06                                                 | 06                                                   |
| f. Social cash transfer                            | 07                                                 | 07                                                   |
| i) Poverty cash transfer                           | 08                                                 | 08                                                   |
| ii) Disability grant                               | 09                                                 | 09                                                   |
| iii) Child support grant                           | 10                                                 | 10                                                   |
| iv) Old age pension                                | 11                                                 | 11                                                   |
| v) Foster care grant                               | 12                                                 | 12                                                   |
| vi)                                                | 13                                                 | 13                                                   |
| vi) Other (specify)                                | 14                                                 | 14                                                   |
| g. Formal business (registered)                    | 15                                                 | 15                                                   |
| h. Informal business (non-registered - see below*) | 16                                                 | 16                                                   |
| i. Private insurance/pension                       | 17                                                 | 17                                                   |
| j. Workman's Compensation                          | 18                                                 | 18                                                   |
| k. Rent                                            | 19                                                 | 19                                                   |
| l. Other (specify)                                 | 20                                                 | 20                                                   |
| m. No income from any source                       | 21                                                 |                                                      |
| n. Not stated/Refused                              | 22                                                 |                                                      |

\*This includes payments received for handicrafts, knitting, sewing, repairing shoes, repairing punctures, for providing services (e.g. making thatch roofs for huts, cutting reeds etc.). Also includes income from selling e.g. charcoal, local gin, local beer etc.

**Question (19):**

Are the primary sources of income stable and regular?

*Kodi njira zodalilika zopezera ndalama ndi zokhazikika?*

|     |    |
|-----|----|
| Yes | No |
| 1   | 2  |



**SECTION E: OWNERSHIP**

**Question (20):**

Do you or anyone in your household own any of the following (in working condition)?

*Kodi inu kapena wina wake pakhomo pano ali ndi zinthu izi zoti zikugwira ntchito?*

|                                | Yes | No |
|--------------------------------|-----|----|
| a. Radio                       | 1   | 2  |
| b. Hi-fi/music stereo          | 1   | 2  |
| c. Internet access in the home | 1   | 2  |
| d. DVD/VHS player              | 1   | 2  |
| e. Cell phone/mobile           | 1   | 2  |
| f. Telephone in the house      | 1   | 2  |
| g. Iron                        | 1   | 2  |
| h. Fan                         | 1   | 2  |
| i. Heater                      | 1   | 2  |
| j. Air conditioner             | 1   | 2  |
| k. Stove with gas/electric     | 1   | 2  |
| l. Stove with paraffin         | 1   | 2  |
| m. Sofa                        | 1   | 2  |
| n. Television                  | 1   | 2  |

|                            | Yes | No |
|----------------------------|-----|----|
| o. Refrigerator            | 1   | 2  |
| p. Microwave               | 1   | 2  |
| q. Electricity             | 1   | 2  |
| r. Solar energy system     | 1   | 2  |
| s. Electrical generator    | 1   | 2  |
| t. Personal computer       | 1   | 2  |
| u. Bicycle                 | 1   | 2  |
| v. Motorcycle/quad bike    | 1   | 2  |
| w. Dishwasher              | 1   | 2  |
| x. Bed(s)                  | 1   | 2  |
| y. Livestock (cattle etc.) | 1   | 2  |
| z. Washing machine         | 1   | 2  |
| aa. Satellite dish         | 1   | 2  |
| bb. Car                    | 1   | 2  |

**SECTION F: POPULATION DISPLACEMENT**

**Question (21):**

Have you and your family ever been forced or obliged to leave your home or place of habitual residence?

*Kodi inu ndi banja lanu munayamba mwakakamizidwa kuchoka malo amene mumakhala?*

| Yes | No |
|-----|----|
| 1   | 2  |

→ If the answer is NO, skip to Question 23



**Question (22):**

Could you tell me the main reason that you have moved from your home? [Circle **one** only]

*Chifukwa chenicheni chimene munachokera kumene mumakhala?*

| Main reason                                                             | Code |
|-------------------------------------------------------------------------|------|
| Armed conflict                                                          | 1    |
| General violence                                                        | 2    |
| Violations of human rights (political persecution)                      | 3    |
| Natural or human-made disasters                                         | 4    |
| Economic reasons (unemployment, services, education, health care, etc.) | 5    |
| Farm eviction                                                           | 6    |
| Other, specify _____                                                    | 7    |

**Question (23):**

What language do you speak most often at home? [Circle **one** only]

*Ndi chiyankhulo chanji chomwe mumayankhula pa nyumba kawirikawiri?*

| Language group       | Code |
|----------------------|------|
| Chichewa             | 1    |
| Chiyao               | 2    |
| English              | 3    |
| Chitumbuka           | 4    |
| Chitonga             | 5    |
| Chilomwe             | 6    |
| Chisena              | 7    |
| Chinkhonde           | 8    |
| Other, specify _____ | 10   |

**Question (24):**

Do you feel that your language group is a minority?

*Kodi anthu a chilankhulo chanu ndi ochepa?*

| Yes | No |
|-----|----|
| 1   | 2  |

## SECTION G: USE OF HEALTH FACILITY

### Question (25):

Do members of your household generally use the .....(NAME OF FACILITY):

*Kodi anthu a munyumba mwanu amagwiritsa ntchito..... (DZINA LA CHIPATALA)*

| Frequency                                 | Code |
|-------------------------------------------|------|
| Yes, always                               | 1    |
| Yes, sometimes                            | 2    |
| Use both health care facility plus others | 3    |
| No, but use other health care facilities  | 4    |
| Never use any health care facilities      | 5    |

→ If the answer is 'YES, always', end the interview.

### Question (26):

What are the main reasons why you *never* use this facility, or only use it *sometimes*, or why you use *other* facilities?

*Kodi ndi zifukwa zotani zomwe simugwiritsa ntchito chipatala chimenechi kapena mumagwiritsa ntchito mwa apo ndi apo kapena mumapita kwina?*

| Main reasons                                                | Code | Main reasons                                          | Code |
|-------------------------------------------------------------|------|-------------------------------------------------------|------|
| a. Cost                                                     | 01   | l. There are no services                              | 12   |
| b. No transport                                             | 02   | m. Language barrier                                   | 13   |
| c. Discrimination by health providers                       | 03   | n. Distance from home to clinic                       | 14   |
| d. Attitudes of health care providers                       | 04   | o. Physical accessibility of the facility             | 15   |
| e. Had a bad incident and so don't go anymore               | 05   | p. Not satisfied with outcomes of previous experience | 16   |
| f. The gender of health care provider                       | 06   | q. Opening times are not suitable                     | 17   |
| g. The type (professional category) of health care provider | 07   | r. Not sick enough or not sick (do not need)          | 18   |
| h. Old age                                                  | 08   | s. Waiting times too long                             | 19   |
| i. Disability                                               | 09   | t. Religious belief                                   | 20   |
| j. Crime, danger                                            | 10   | u. No knowledge about the health facility             | 21   |
| k. Lack of time due to domestic or other responsibilities   | 11   | v. Other, specify .....                               | 22   |

**THANK YOU VERY MUCH FOR YOUR TIME!**
